# Supplementary material for: Filament organization of the bacterial actin MreB is dependent on the nucleotide state
Source: PubMed Central journal article supplement (PMC9195046; doi:10.1083/jcb.202106092), 2022-04-04
Supplement: JCB_202106092_SourceDataF5.pdf [file JCB_202106092_SourceDataF5.pdf]

# SourceDataF5D

## Anti-GFP

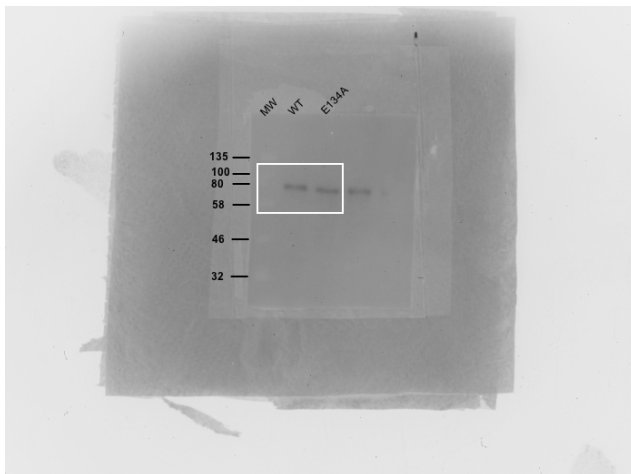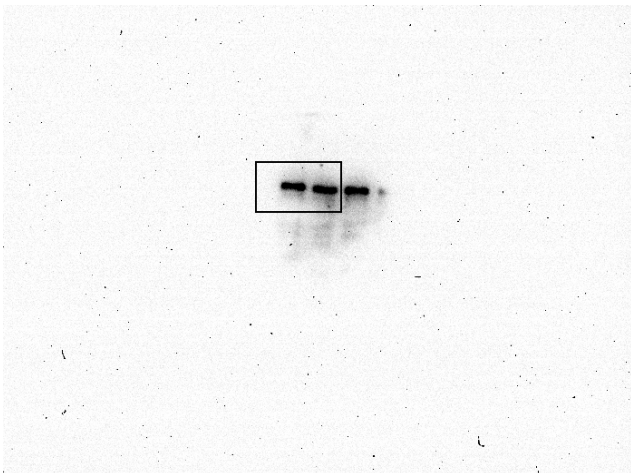

## Anti- $\alpha$ -Tubulin

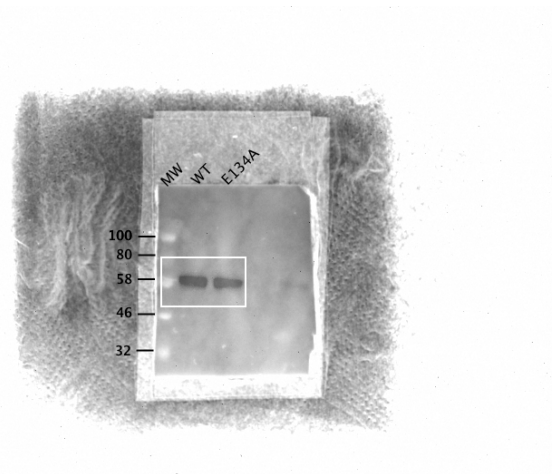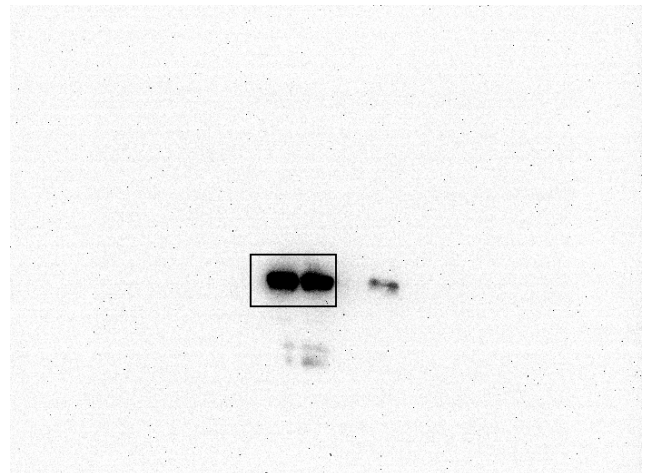

The data included in the figure was from the contrast-adjusted bottom panel (boxed portion only).
