# Supplementary material for: Filament organization of the bacterial actin MreB is dependent on the nucleotide state
Source: PubMed Central journal article supplement (PMC9195046; doi:10.1083/jcb.202106092), 2022-04-04

## SourceDataF7A

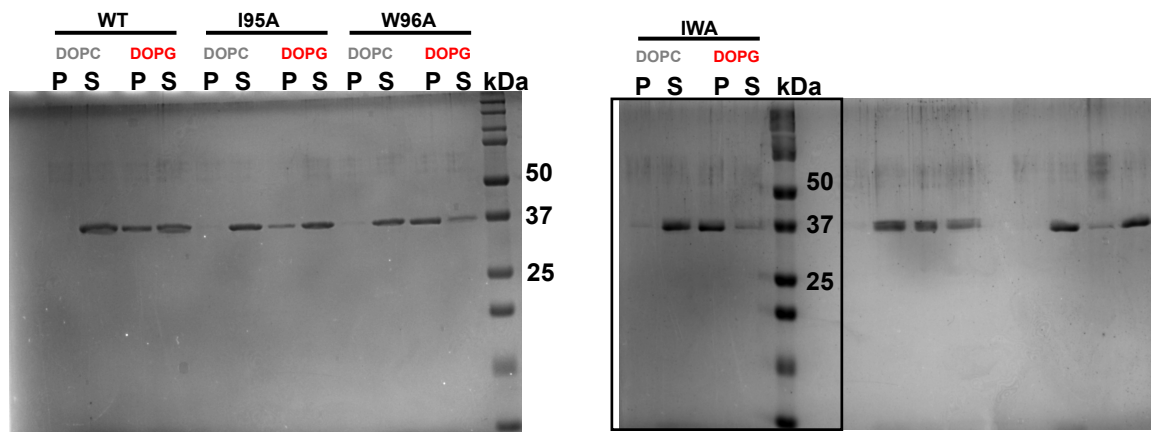

## SourceDataF7D

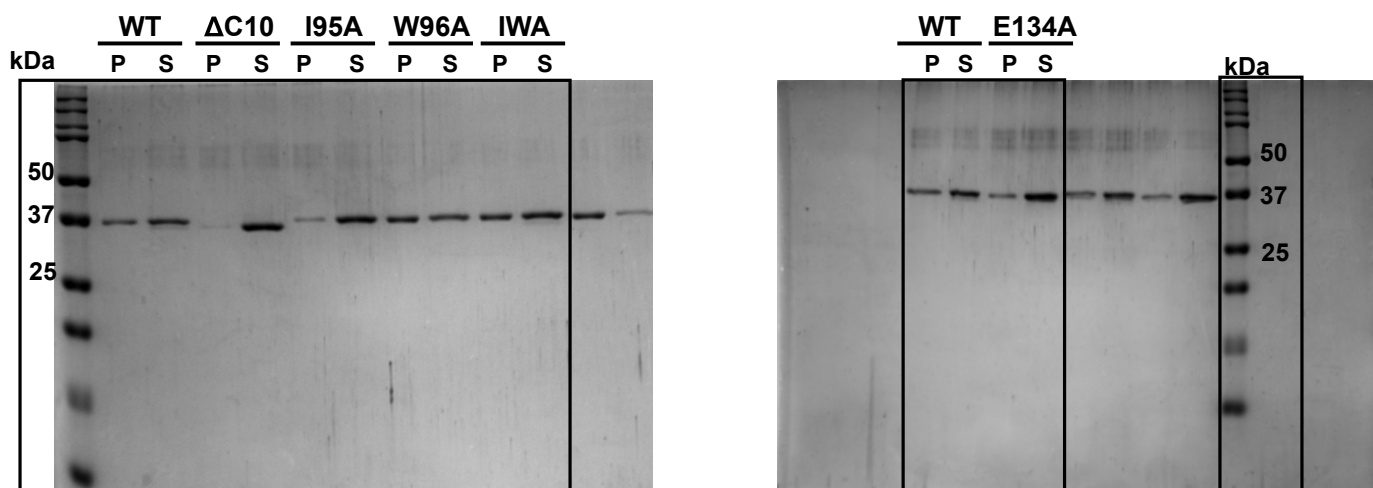

## SourceDataF7G

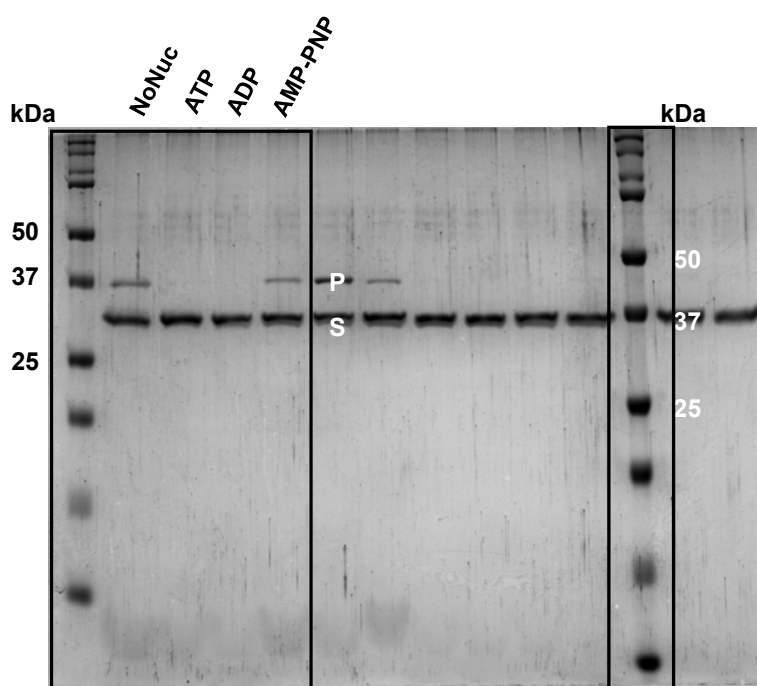

Supplement: JCB_202106092_SourceDataF7.pdf [file JCB_202106092_SourceDataF7.pdf]
