# Supplementary material for: Filament organization of the bacterial actin MreB is dependent on the nucleotide state
Source: PubMed Central journal article supplement (PMC9195046; doi:10.1083/jcb.202106092), 2022-04-04

# SourceDataFS3A

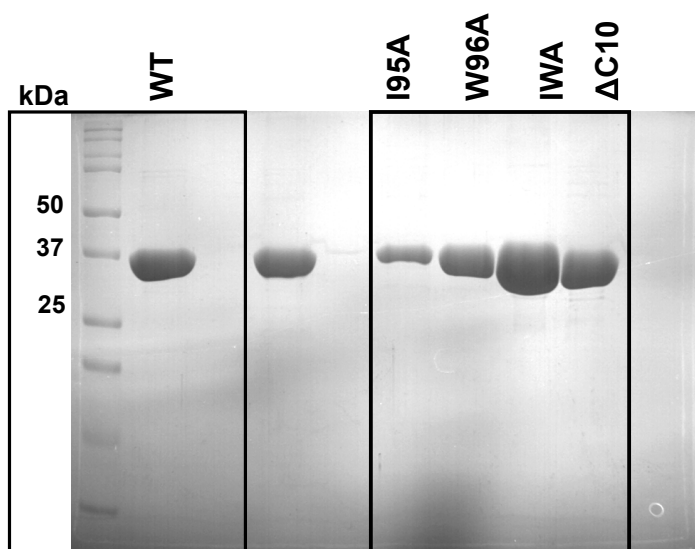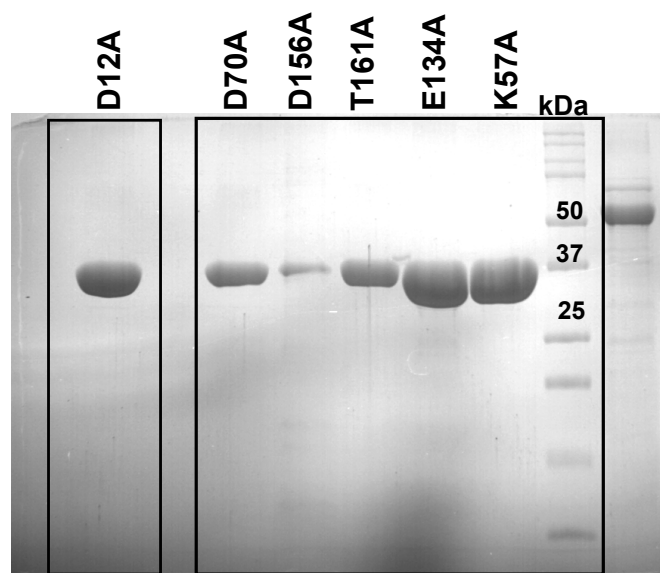

Supplement: JCB_202106092_SourceDataFS3.pdf [file JCB_202106092_SourceDataFS3.pdf]
